# Supplementary material
Source: publisher figshare collection journal article supplement (https://acs.figshare.com/ndownloader/files/8465423)
Supplement: Supplementary file 1 [file 8465423]

## Supporting Information

# Stapled RGD Peptide Enables Glioma-Targeted Drug Delivery by Overcoming Multiple Barriers

*Huitong Ruan,<sup>a,‡</sup> Xishan Chen,<sup>a,‡</sup> Cao Xie,<sup>a</sup> Beibei Li,<sup>a</sup> Man Ying,<sup>a</sup> Yu Liu,<sup>a</sup> Mingfei Zhang,<sup>a</sup>  
Xuesai Zhang,<sup>a</sup> Changyou Zhan,<sup>c</sup> Wuyuan Lu,<sup>b</sup> Weiyue Lu<sup>\*,a,d,e</sup>*

<sup>a</sup>Key Laboratory of Smart Drug Delivery of the Ministry of Education (Fudan University), & Department of Pharmaceutics, School of Pharmacy, Fudan University, Shanghai 201203, P.R. China.

<sup>b</sup>Institute of Human Virology & Department of Biochemistry and Molecular Biology, University of Maryland School of Medicine, Baltimore, Maryland 21201, United States.

<sup>c</sup>Department of Pharmacology, School of Basic Medical Sciences, Fudan University, Shanghai 200032, China

<sup>d</sup>State Key Laboratory of Molecular Engineering of Polymers, Fudan University, Shanghai 200433, P.R. China.

<sup>e</sup>State Key Laboratory of Medical Neurobiology & the Collaborative Innovation Center for Brain Science, Fudan University, Shanghai 200032, P.R. China.

\* Author for correspondence:

Weiyue Lu, 826 Zhangheng RD., Pudong District, Shanghai 201203, PR China,

Emial: wylu@shmu.edu.cn, Tel: +86 21 51980006, Fax: +86 215288 0090

‡These authors contributed equally.

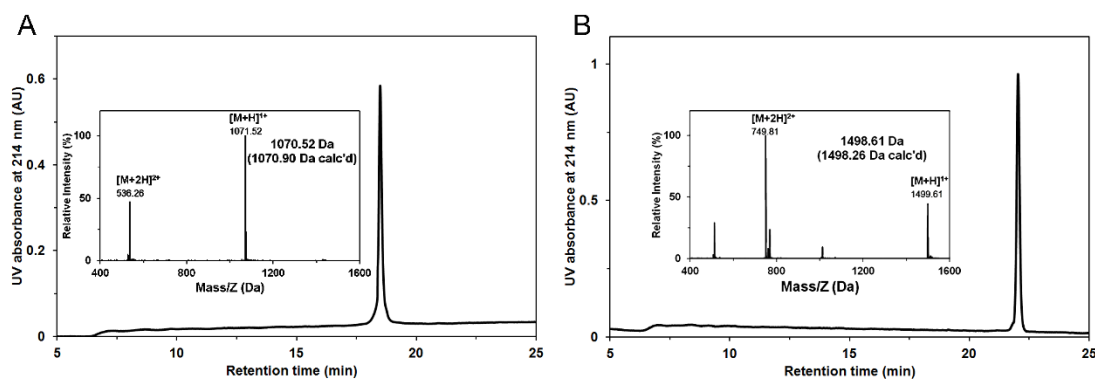

**Figure S1.** Analysis of sRGD (A) and sRGD-FAM (B) via HPLC and ESI-MS. The conditions of HPLC analysis as follows: temperature: 40°C; C<sub>18</sub> column: YMC, 3.5 μm, 4.6 × 150 mm; flowing phase: 5-65% acetonitrile in water with 0.1% TFA over 30 min; flow rate: 0.7 mL/min.

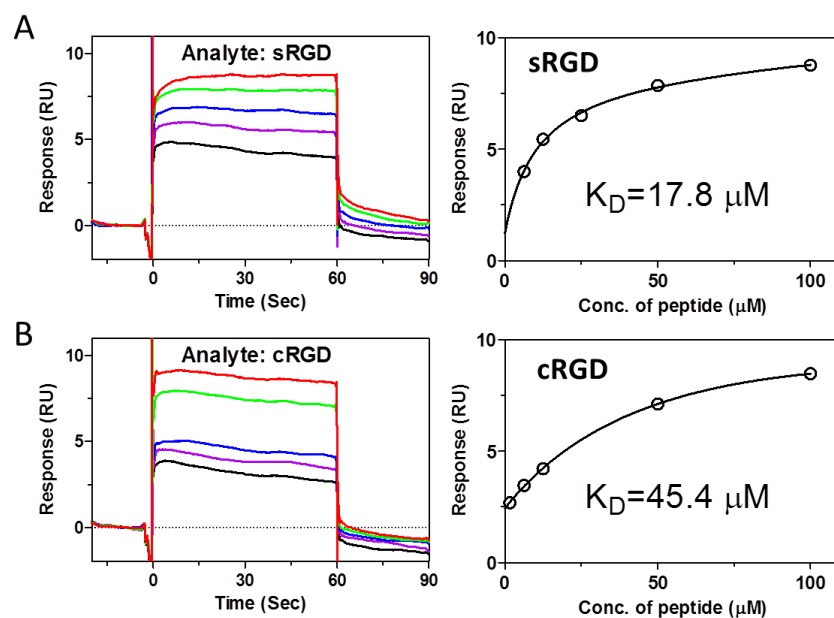

**Figure S2.** Quantification of the binding affinity of sRGD (A) and cRGD (B) with integrin  $\alpha_v\beta_3$  by an SPR-based direct binding assay at 25°C on a Biacore T200 instrument. The  $K_D$  values were determined by the BIA evaluation software.

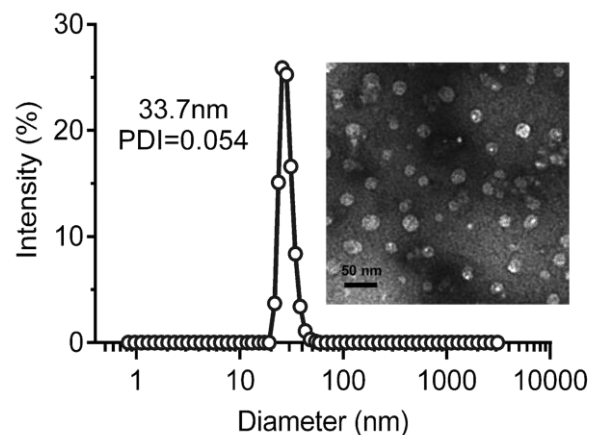

**Figure S3.** Size distribution of sRGD-PEG-PLA/PTX micelles measured by DLS and TEM.

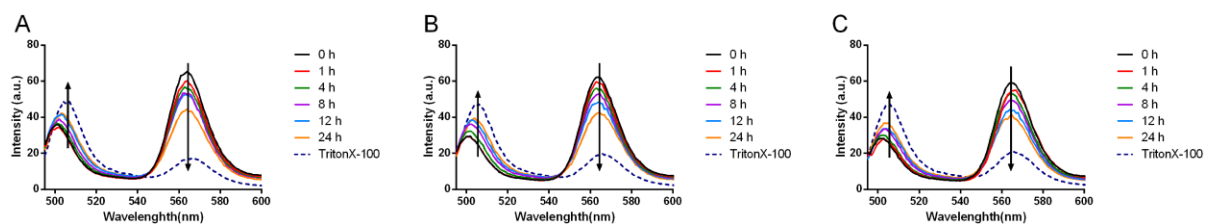

**Figure S4.** Emission fluorescence spectra overlay for DiO/DiI-loaded PEG-PLA micelles in 20% rat serum: (A) mPEG-PLA micelles, (B) cRGD-PEG-PLA micelles, and (C) sRGD-PEG-PLA micelles. TritonX-100 treated micelles were used as the positive control (complete disassembly of micelle). Ex: 484 nm, Em: 495–600 nm.

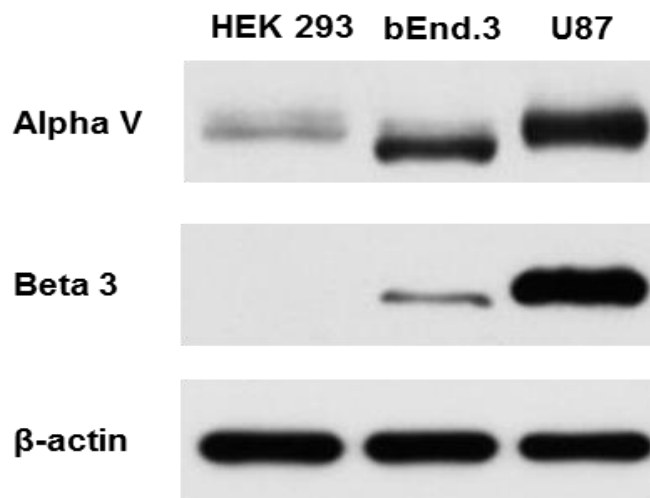

**Figure S5.** Expression levels of integrin Alpha V and Beta 3 on negative HEK293, bEnd.3 and positive U87 cells analyzed by western blotting.

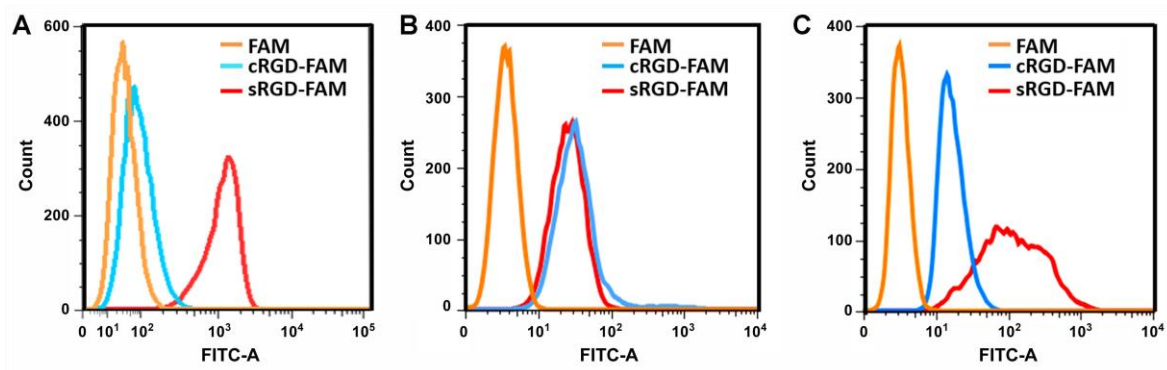

**Figure S6.** Cellular uptake of 5  $\mu$ M free FAM, cRGD-FAM or sRGD-FAM on bEnd.3 (A), U87 (B) and HUVEC (C) cells analyzed by flow cytometry.

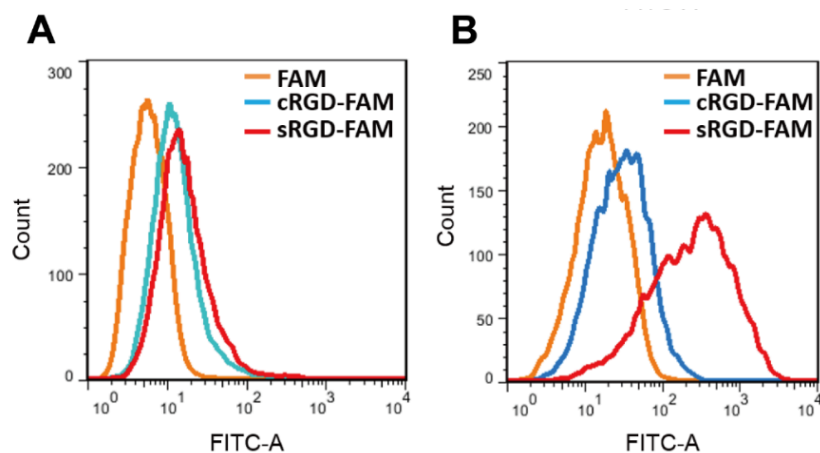

**Figure S7.** Cellular uptake of 5  $\mu$ M free FAM, cRGD-FAM or sRGD-FAM on HL-7702 (A) and HEK293 (B) cells analyzed by flow cytometry.

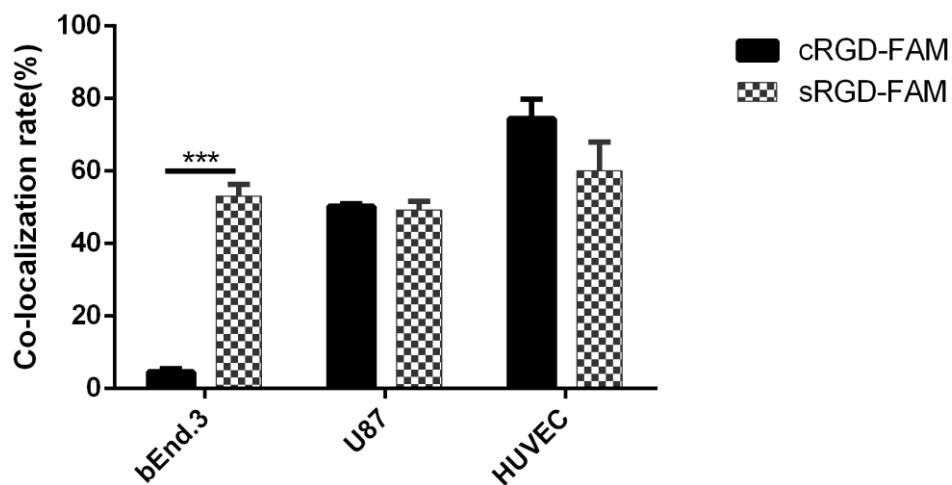

**Figure S8.** Mander's overlap coefficient analysis of different FAM-labeled peptide co-localized with lysosome calculated by Image-Pro Plus software in three different divisions. mean  $\pm$  SD, n = 3, \*\*\* p < 0.001.

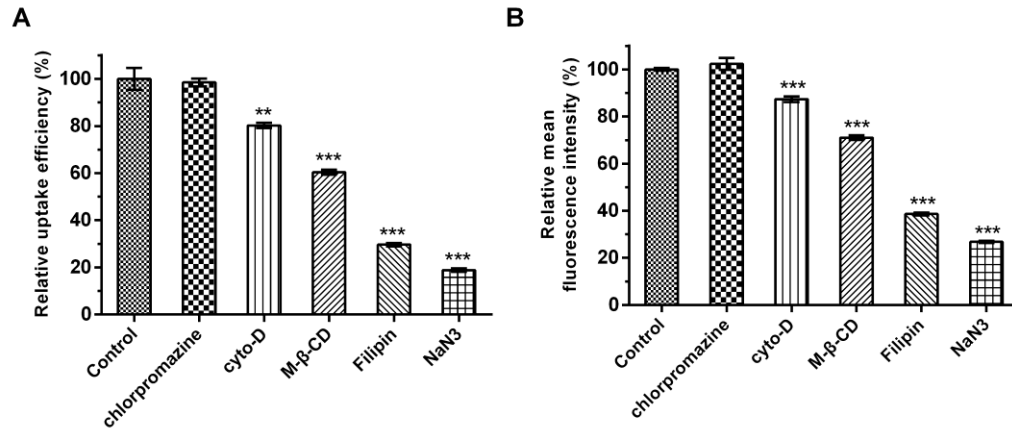

**Figure S9.** Relative cellular uptake efficiency (A) and relative mean fluorescence intensity (B) of sRGD-FAM by bEnd.3 cells in the presence of different endocytosis inhibitors measured by a flow cytometer. Results were presented as mean  $\pm$  SD,  $n = 3$ . Significance: \*\*\*  $p < 0.001$ , \*\*  $p < 0.01$ , versus control group respectively.

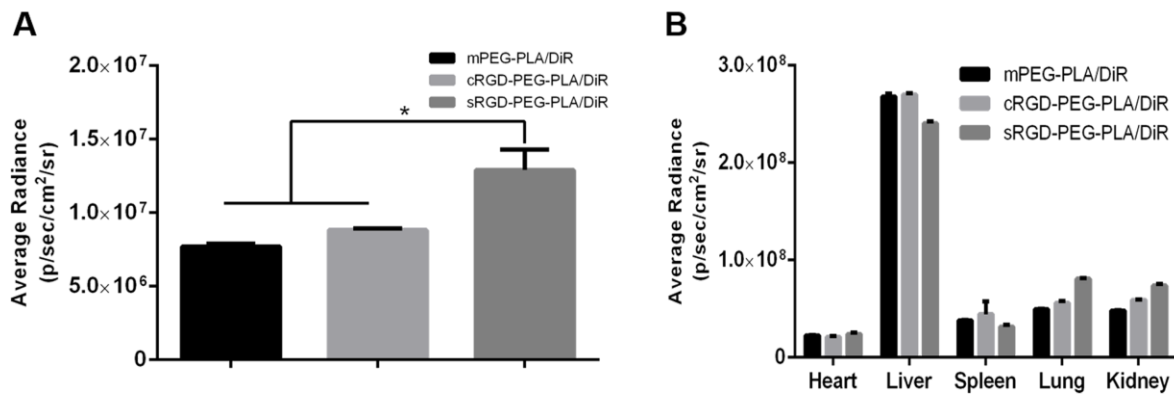

**Figure S10.** Semi-quantitative ROI analysis of the mean fluorescence intensity of DiR-loaded mPEG-PLA, cRGD-PEG-PLA and sRGD-PEG-PLA in *ex vivo* brain (A) and other major organs (B) 24 h after administration.

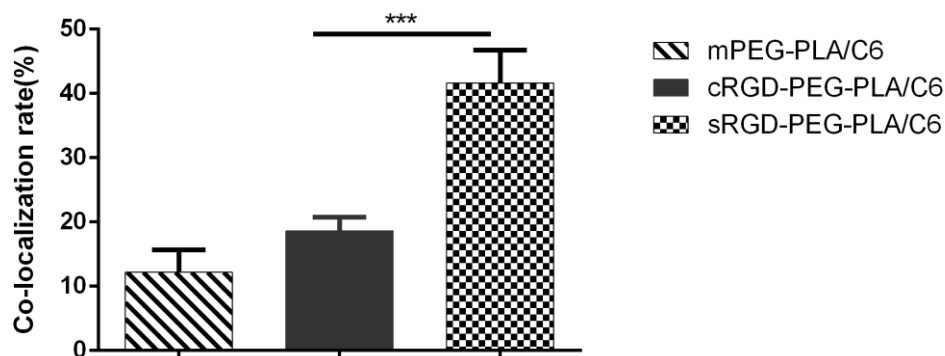

**Figure S11.** Mander's overlap coefficient analysis of different formulations co-localized with CD31 marker calculated by Image-Pro Plus software. Results were presented as mean  $\pm$  SD, n = 3, \*\*\* p < 0.001.

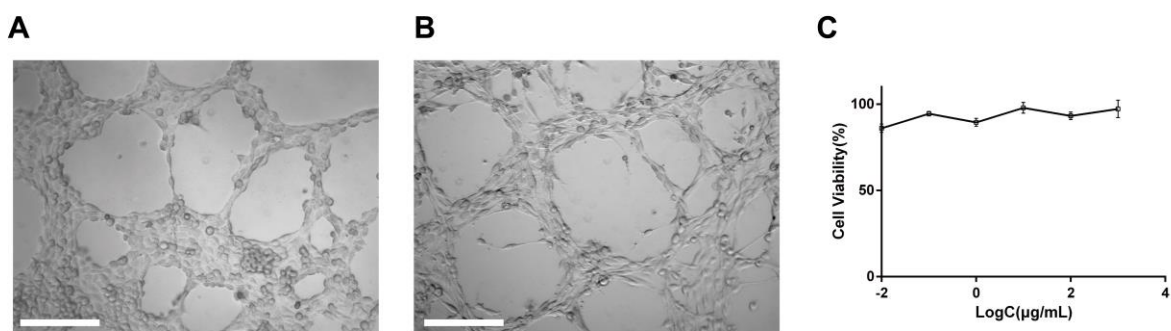

**Figure S12.** Toxicity evaluation of unloaded sRGD-PEG-PLA micelles *in vitro* anti-neovascularization (A), anti-VM Efficacy (B) and cytotoxicity effect on U87 cells measured by MTT assay (C). Bar = 200  $\mu$ m.
